# Supplementary material for: Uncovering the role of non-covalent interactions in solid-state photoswitches by non-spherical structure refinements with NoSpherA2
Source: Royal Society of Chemistry journal article supplement (doi:10.1039/d2fd00158f), 2022-12-23
Supplement: d2fd00158f1.pdf [file d2fd00158f1.pdf]

# Uncovering the role of non-covalent interactions in solid-state photoswitches by non-spherical structure refinements with NoSpherA2

Lauren E. Hatcher,<sup>\*a</sup> Lucy K. Saunders<sup>b</sup> and Ben A. Coulson<sup>a</sup>

## Supplementary Information

<sup>a</sup> School of Chemistry, Cardiff University, Main Building, Park Place, Cardiff, CF10 4AT, UK. E-mail: HatcherL1@cardiff.ac.uk.

<sup>b</sup> Diamond Light Source, Harwell Science and Innovation Campus, Fermi Ave, Didcot OX11 0DE.

## 1. Complex 1: [Pd(Bu<sub>4</sub>dien)(NO<sub>2</sub>)]BPh<sub>4</sub>.THF

(a)

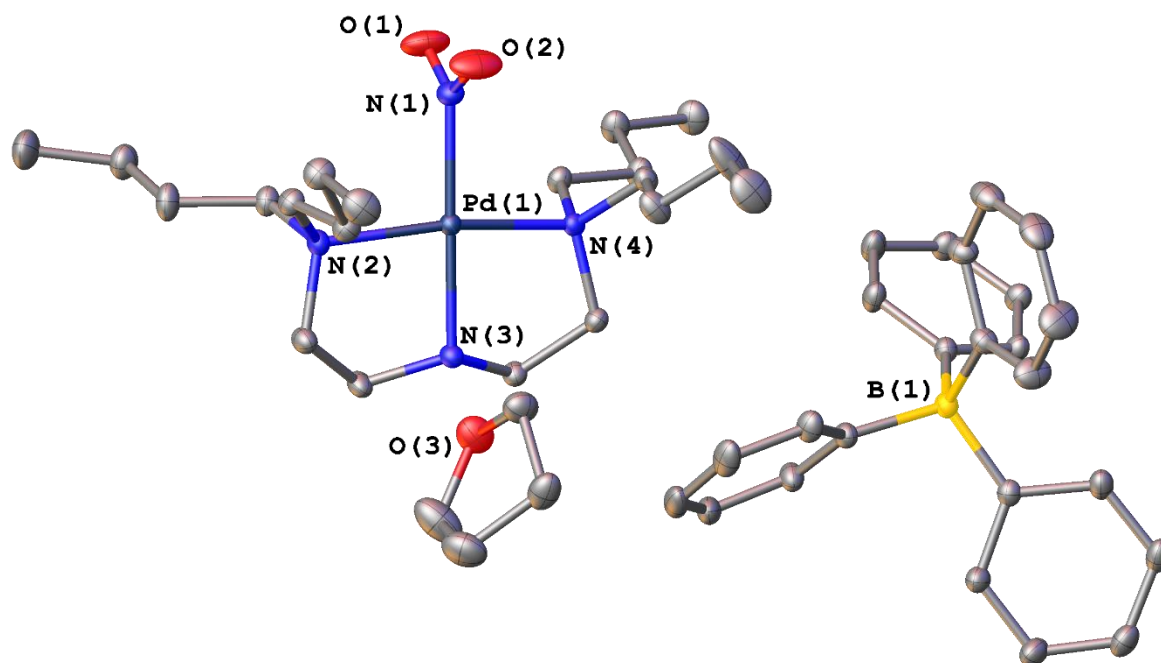

(b)

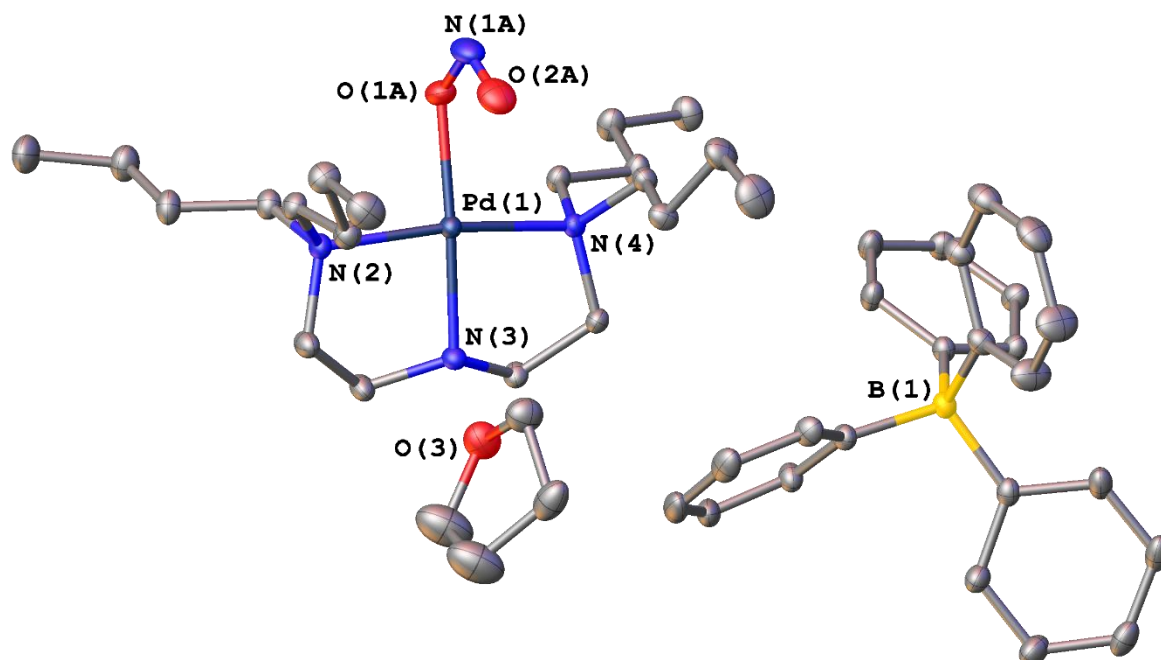

**Figure S1.1** Single crystal X-ray structures showing the atomic connectivity in the asymmetric units of the ground state (a) and 100% photoexcited state (b) isomers of **1**,<sup>1</sup> with selected non-hydrogen atoms labelled. Ellipsoids are shown and 50% probability and hydrogen atoms are removed for clarity.

**Table S1.1** Single-crystal X-ray structure data for **1** collected for HAR using NoSpherA2 in Olex2.<sup>2</sup>

|                                                              | Ground state (GS)                                                             | Excited state (ES)                                                            |
|--------------------------------------------------------------|-------------------------------------------------------------------------------|-------------------------------------------------------------------------------|
| Photoexcitation level/%                                      | 0                                                                             | 100                                                                           |
| Empirical formula                                            | C <sub>48</sub> H <sub>73</sub> BN <sub>4</sub> O <sub>3</sub> Pd             | C <sub>48</sub> H <sub>73</sub> BN <sub>4</sub> O <sub>3</sub> Pd             |
| Formula weight                                               | 871.379                                                                       | 871.379                                                                       |
| Temperature/K                                                | 100(1)                                                                        | 100(1)                                                                        |
| Crystal system                                               | monoclinic                                                                    | monoclinic                                                                    |
| Space group                                                  | <i>P</i> 2 <sub>1</sub> / <i>n</i>                                            | <i>P</i> 2 <sub>1</sub> / <i>n</i>                                            |
| <i>a</i> /Å                                                  | 11.5486(1)                                                                    | 11.4841(1)                                                                    |
| <i>b</i> /Å                                                  | 13.4064(2)                                                                    | 13.3657(1)                                                                    |
| <i>c</i> /Å                                                  | 29.7815(3)                                                                    | 30.0180(3)                                                                    |
| $\alpha$ /°                                                  | 90                                                                            | 90                                                                            |
| $\beta$ /°                                                   | 95.424(1)                                                                     | 94.602(1)                                                                     |
| $\gamma$ /°                                                  | 90                                                                            | 90                                                                            |
| Volume/Å <sup>3</sup>                                        | 4590.28(9)                                                                    | 4592.70(7)                                                                    |
| <i>Z</i>                                                     | 4                                                                             | 4                                                                             |
| $\rho_{\text{calc}}/\text{gcm}^{-3}$                         | 1.261                                                                         | 1.260                                                                         |
| $\mu/\text{mm}^{-1}$                                         | 0.448                                                                         | 0.448                                                                         |
| <i>F</i> (000)                                               | 1853.0                                                                        | 1853.0                                                                        |
| Radiation                                                    | Mo K $\alpha$ ( $\lambda$ = 0.71073)                                          | Mo K $\alpha$ ( $\lambda$ = 0.71073)                                          |
| 2 $\theta$ range for data collection/°                       | 6.44 to 72.64                                                                 | 6.68 to 72.64                                                                 |
| Completeness (resolution)                                    | 0.9978 (0.6 Å)                                                                | 0.9977 (0.6 Å)                                                                |
| Reflections collected                                        | 116467                                                                        | 116537                                                                        |
| Independent reflections                                      | 22256 [ <i>R</i> <sub>int</sub> = 0.0541, <i>R</i> <sub>sigma</sub> = 0.0420] | 22260 [ <i>R</i> <sub>int</sub> = 0.0542, <i>R</i> <sub>sigma</sub> = 0.0425] |
| Data/restraints/parameters                                   | 22256/339/1159                                                                | 22260/282/1111                                                                |
| Goodness-of-fit on <i>F</i> <sup>2</sup>                     | 1.059                                                                         | 1.047                                                                         |
| Final <i>R</i> indexes [ <i>I</i> ≥ 2 $\sigma$ ( <i>I</i> )] | <i>R</i> <sub>1</sub> = 0.0333, <i>wR</i> <sub>2</sub> = 0.0647               | <i>R</i> <sub>1</sub> = 0.0350, <i>wR</i> <sub>2</sub> = 0.0715               |
| Final <i>R</i> indexes [all data]                            | <i>R</i> <sub>1</sub> = 0.0477, <i>wR</i> <sub>2</sub> = 0.0707               | <i>R</i> <sub>1</sub> = 0.0517, <i>wR</i> <sub>2</sub> = 0.0791               |
| Largest diff. peak/hole / e Å <sup>-3</sup>                  | 1.11/-0.85                                                                    | 1.89/-1.14                                                                    |

**Table S1.2** Experimental bond lengths for non-hydrogen atoms determined by single-crystal X-ray diffraction for the ground state (GS) structure of **1** at 100 K. All bond lengths are all given in Å.

| Atom  | Atom  | Length/Å   | Atom  | Atom  | Length/Å   |
|-------|-------|------------|-------|-------|------------|
| Pd(1) | N(1)  | 2.0171(9)  | C(46) | C(47) | 1.532(2)   |
| Pd(1) | N(2)  | 2.0922(9)  | C(47) | C(48) | 1.506(2)   |
| Pd(1) | N(3)  | 2.0244(8)  | C(21) | C(22) | 1.4023(16) |
| Pd(1) | N(4)  | 2.0952(8)  | C(21) | C(26) | 1.4034(16) |
| O(1)  | N(1)  | 1.2253(13) | C(21) | B(1)  | 1.6445(15) |
| O(2)  | N(1)  | 1.2201(13) | C(22) | C(23) | 1.3926(17) |
| N(2)  | C(1)  | 1.5013(13) | C(23) | C(24) | 1.387(2)   |
| N(2)  | C(5)  | 1.4943(13) | C(24) | C(25) | 1.3946(19) |
| N(2)  | C(9)  | 1.5081(13) | C(25) | C(26) | 1.3947(16) |
| N(3)  | C(2)  | 1.4800(13) | C(27) | C(28) | 1.4001(14) |
| N(3)  | C(3)  | 1.4796(13) | C(27) | C(32) | 1.4036(15) |
| N(4)  | C(4)  | 1.5042(13) | C(27) | B(1)  | 1.6427(15) |
| N(4)  | C(13) | 1.4920(13) | C(28) | C(29) | 1.3925(16) |
| N(4)  | C(17) | 1.5066(12) | C(29) | C(30) | 1.3890(19) |
| C(1)  | C(2)  | 1.5149(15) | C(30) | C(31) | 1.3930(18) |
| C(3)  | C(4)  | 1.5140(14) | C(31) | C(32) | 1.3943(15) |
| C(5)  | C(6)  | 1.5172(15) | C(33) | C(34) | 1.4070(14) |
| C(6)  | C(7)  | 1.5266(15) | C(33) | C(38) | 1.4032(14) |
| C(7)  | C(8)  | 1.5210(16) | C(33) | B(1)  | 1.6470(15) |
| C(9)  | C(10) | 1.5198(15) | C(34) | C(35) | 1.3944(15) |
| C(10) | C(11) | 1.5215(16) | C(35) | C(36) | 1.3898(16) |
| C(11) | C(12) | 1.5180(18) | C(36) | C(37) | 1.3940(15) |
| C(13) | C(14) | 1.5155(14) | C(37) | C(38) | 1.3929(14) |
| C(14) | C(15) | 1.4920(17) | C(39) | C(40) | 1.4022(15) |
| C(15) | C(16) | 1.4849(19) | C(39) | C(44) | 1.4077(14) |
| C(17) | C(18) | 1.5257(14) | C(39) | B(1)  | 1.6467(15) |
| C(18) | C(19) | 1.5261(15) | C(40) | C(41) | 1.3992(15) |
| C(19) | C(20) | 1.5206(16) | C(41) | C(42) | 1.3920(17) |
| O(3)  | C(45) | 1.4278(15) | C(42) | C(43) | 1.3879(17) |
| O(3)  | C(48) | 1.4351(18) | C(43) | C(44) | 1.3928(16) |
| C(45) | C(46) | 1.5091(18) |       |       |            |

**Table S1.3** Experimental bond lengths for non-hydrogen atoms determined by single-crystal X-ray diffraction for the excited state (ES) structure of **1** at 100 K. All bond lengths are all given in Å.

| <b>Atom</b> | <b>Atom</b> | <b>Length/Å</b> | <b>Atom</b> | <b>Atom</b> | <b>Length/Å</b> |
|-------------|-------------|-----------------|-------------|-------------|-----------------|
| Pd(1)       | O(1A)       | 2.0418(9)       | C(46)       | C(47)       | 1.538(3)        |
| Pd(1)       | N(2)        | 2.0804(9)       | C(47)       | C(48)       | 1.478(3)        |
| Pd(1)       | N(3)        | 2.0137(9)       | C(21)       | C(22)       | 1.4046(17)      |
| Pd(1)       | N(4)        | 2.0901(9)       | C(21)       | C(26)       | 1.4021(17)      |
| O(1A)       | N(1A)       | 1.3010(15)      | C(21)       | B(1)        | 1.6430(17)      |
| O(2A)       | N(1A)       | 1.2070(17)      | C(22)       | C(23)       | 1.3919(19)      |
| N(2)        | C(1)        | 1.5033(15)      | C(23)       | C(24)       | 1.390(2)        |
| N(2)        | C(5)        | 1.4953(14)      | C(24)       | C(25)       | 1.388(2)        |
| N(2)        | C(9)        | 1.5028(15)      | C(25)       | C(26)       | 1.3960(17)      |
| N(3)        | C(2)        | 1.4854(14)      | C(27)       | C(28)       | 1.4019(15)      |
| N(3)        | C(3)        | 1.4790(14)      | C(27)       | C(32)       | 1.4044(16)      |
| N(4)        | C(4)        | 1.5046(14)      | C(27)       | B(1)        | 1.6385(16)      |
| N(4)        | C(13)       | 1.4921(14)      | C(28)       | C(29)       | 1.3958(17)      |
| N(4)        | C(17)       | 1.5022(14)      | C(29)       | C(30)       | 1.390(2)        |
| C(1)        | C(2)        | 1.5134(16)      | C(30)       | C(31)       | 1.392(2)        |
| C(3)        | C(4)        | 1.5141(15)      | C(31)       | C(32)       | 1.3921(16)      |
| C(5)        | C(6)        | 1.5178(16)      | C(33)       | C(34)       | 1.4087(15)      |
| C(6)        | C(7)        | 1.5257(17)      | C(33)       | C(38)       | 1.4036(14)      |
| C(7)        | C(8)        | 1.5202(19)      | C(33)       | B(1)        | 1.6450(16)      |
| C(9)        | C(10)       | 1.5258(16)      | C(34)       | C(35)       | 1.3926(16)      |
| C(10)       | C(11)       | 1.5198(18)      | C(35)       | C(36)       | 1.3921(17)      |
| C(11)       | C(12)       | 1.5217(19)      | C(36)       | C(37)       | 1.3911(16)      |
| C(13)       | C(14)       | 1.5163(16)      | C(37)       | C(38)       | 1.3940(15)      |
| C(14)       | C(15)       | 1.5225(17)      | C(39)       | C(40)       | 1.4021(17)      |
| C(15)       | C(16)       | 1.517(2)        | C(39)       | C(44)       | 1.4094(15)      |
| C(17)       | C(18)       | 1.5273(15)      | C(39)       | B(1)        | 1.6473(17)      |
| C(18)       | C(19)       | 1.5201(17)      | C(40)       | C(41)       | 1.3980(17)      |
| C(19)       | C(20)       | 1.5194(17)      | C(41)       | C(42)       | 1.3883(18)      |
| O(3)        | C(45)       | 1.4219(18)      | C(42)       | C(43)       | 1.392(2)        |
| O(3)        | C(48)       | 1.432(2)        | C(43)       | C(44)       | 1.3862(18)      |
| C(45)       | C(46)       | 1.518(2)        |             |             |                 |

(a)

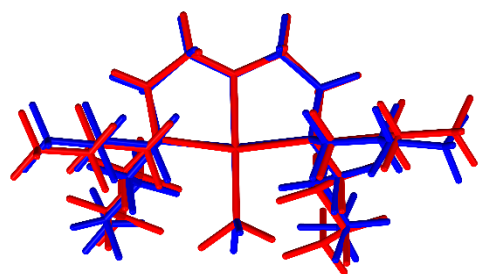

GS nitro-( $\eta^1$ -NO<sub>2</sub>): RMSD = 0.3861

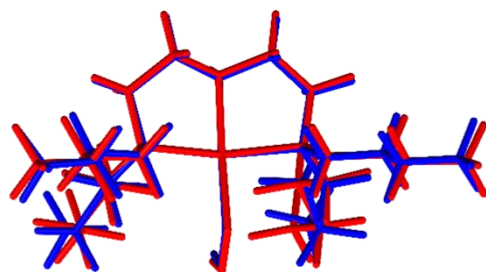

ES nitrito-( $\eta^1$ -ONO): RMSD = 0.1802

(b)

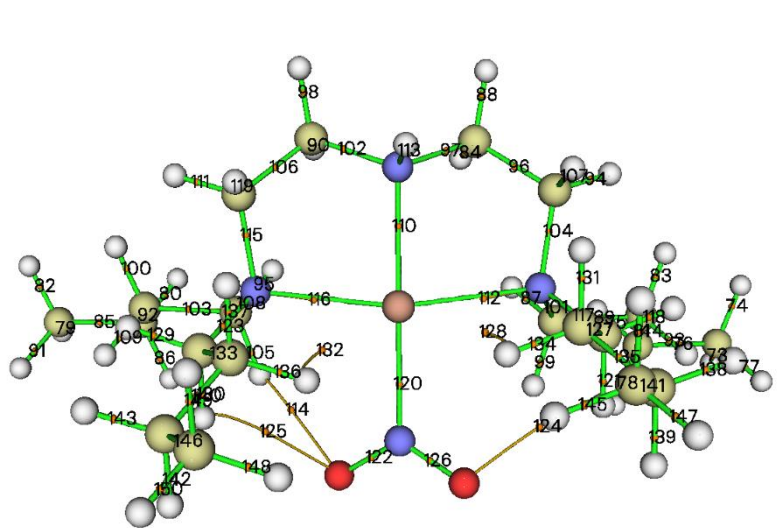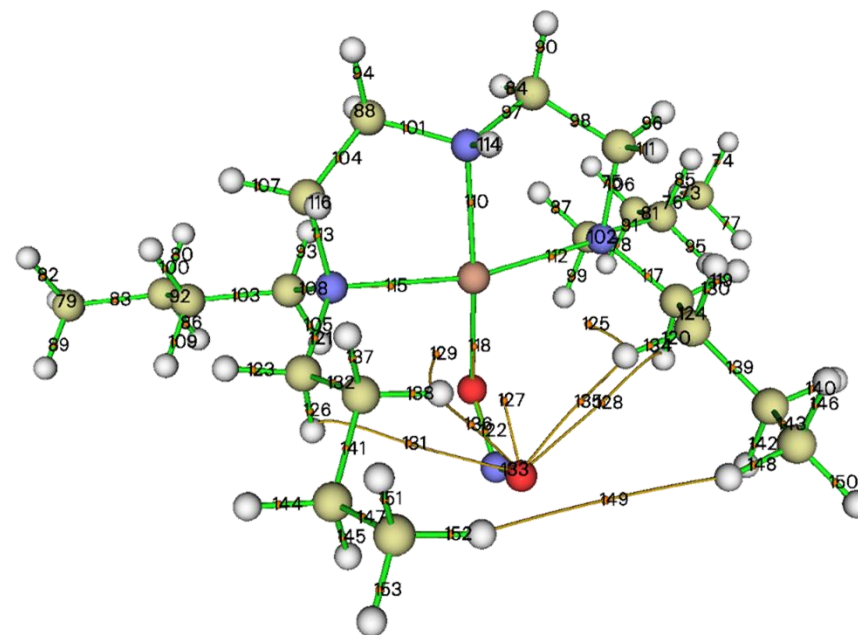

(c)

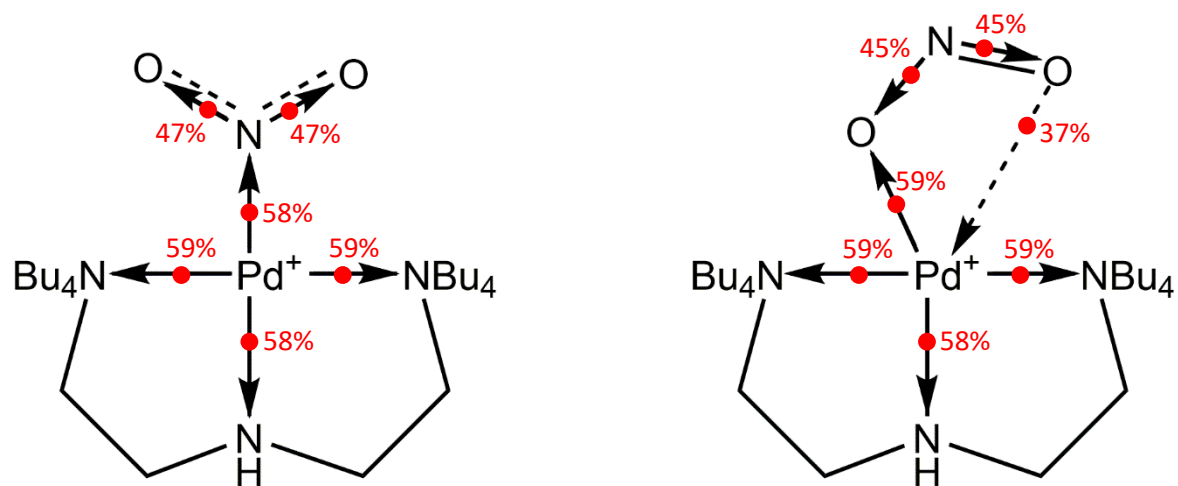

**Figure S1.2** Theoretical analysis of the ground and photoexcited isomers of the photoactive  $[\text{Pd}(\text{Bu}_4\text{dien})(\text{NO}_2)]^+$  cation in **1**, from gas-phase molecular DFT calculations using Gaussian-09<sup>3</sup> [B3LYP/SDD for Pd and B3LYP/6-311+G(d) for C, H, N, and O]. **(a)** Molecular overlays between the geometry optimised structures (red) and experimental crystal structures (blue) of the cations in the GS and ES. **(b)** Diagrams showing the positions of (3,-1) bond critical points for the optimised GS and ES cations, generated from theoretical topology analysis in Multiwfn<sup>4</sup> (note: though CPs are found in each instance of interaction, the software does not generate the complete bond paths to Pd in the figures in some cases). **(c)** Graphical representations of the Pd<sup>II</sup> square plane for the GS and ES cations, highlighting the positions of key (3,-1) bond critical points (red points) as a percentage along the relevant bond paths. % positions are always defined along the direction highlighted by the arrows (e.g. Pd→N is defined as the % along the path from Pd to N).

**Table S1.4** List of (3,-1) bond critical points (CPs) generated from theoretical topological analysis of the GS photoactive cation of **1**. Wavefunction calculated with Gaussian-09<sup>3</sup> [B3LYP/SDD for Pd and B3LYP/6-311+G(d) for C, H, N, and O] and CPs searched and visualised using Multiwfn.<sup>4</sup>

| CP # | XYZ Coordinates (Bohr) |             |          | Type   | Atom1 – Atom2  |
|------|------------------------|-------------|----------|--------|----------------|
| 73   | -10.6146               | -8.3370905  | -2.9121  | (3,-1) | H(12C) – C(12) |
| 74   | -11.0199               | -7.40527806 | -1.02951 | (3,-1) | H(12A) – C(12) |
| 75   | -7.03457               | -7.21984872 | -1.53897 | (3,-1) | H(11A) – C(11) |
| 76   | -9.17633               | -6.74246675 | -2.1701  | (3,-1) | C(12) – C(11)  |
| 77   | -11.2972               | -6.30939098 | -2.84558 | (3,-1) | C(12) – H(12B) |
| 78   | -7.31035               | -6.13304809 | -3.34308 | (3,-1) | C(11) – H(11B) |
| 79   | 11.23849               | -7.89559283 | -1.87616 | (3,-1) | H(20B) – C(20) |
| 80   | 7.616283               | -6.88300501 | -0.53364 | (3,-1) | H(19A) – C(19) |
| 81   | -7.63524               | -5.07107049 | -1.39944 | (3,-1) | C(11) – C(10)  |
| 82   | 11.61646               | -6.60067287 | -0.21657 | (3,-1) | H(20A) – C(20) |
| 83   | -7.95197               | -3.96210853 | 0.572071 | (3,-1) | H(10A) – C(10) |
| 84   | -2.00107               | -3.39056212 | 4.433096 | (3,-1) | H(2A) – C(2)   |
| 85   | 9.672739               | -6.33291781 | -1.35439 | (3,-1) | C(20) – C(19)  |
| 86   | 7.714017               | -6.12279334 | -2.51407 | (3,-1) | C(19) – H(19B) |
| 87   | -3.95449               | -3.90550023 | -0.12746 | (3,-1) | H(9B) – C(9)   |
| 88   | -2.43921               | -2.21405609 | 6.240763 | (3,-1) | H(2B) – C(2)   |
| 89   | -6.16269               | -3.36747657 | -0.62981 | (3,-1) | C(10) – C(9)   |
| 90   | 2.551774               | -2.92813313 | 4.692567 | (3,-1) | H(3B) – C(3)   |
| 91   | 11.71313               | -5.83595826 | -2.21167 | (3,-1) | C(20) – H(20C) |
| 92   | 8.001229               | -4.69731011 | -0.81046 | (3,-1) | C(19) – C(18)  |
| 93   | -8.25111               | -2.86714784 | -1.22939 | (3,-1) | C(10) – H(10B) |
| 94   | -5.60559               | -1.63663058 | 3.82743  | (3,-1) | H(1B) – C(1)   |
| 95   | 4.26109                | -3.66895336 | 0.351241 | (3,-1) | H(17A) – C(17) |
| 96   | -3.37284               | -1.50296767 | 4.20765  | (3,-1) | C(2) – C(1)    |
| 97   | -1.3822                | -1.56298378 | 4.673064 | (3,-1) | C(2) – N(3)    |
| 98   | 2.742164               | -1.51243968 | 6.360893 | (3,-1) | H(3A) – C(3)   |
| 99   | -4.31587               | -2.72229696 | -1.89102 | (3,-1) | C(9) – H(9A)   |
| 100  | 8.261477               | -3.22821572 | 0.915981 | (3,-1) | H(18B) – C(18) |
| 101  | -4.4872                | -1.98537644 | -0.04427 | (3,-1) | C(9) – N(2)    |
| 102  | 1.590538               | -1.23724614 | 4.752079 | (3,-1) | C(3) – N(3)    |
| 103  | 6.388641               | -3.02202061 | -0.29558 | (3,-1) | C(18) – C(17)  |
| 104  | -4.32814               | -0.77240764 | 2.426717 | (3,-1) | C(1) – N(2)    |
| 105  | 4.456796               | -2.7360447  | -1.59009 | (3,-1) | C(17) – H(17B) |
| 106  | 3.541836               | -0.85428526 | 4.258472 | (3,-1) | C(3) – C(4)    |
| 107  | -4.68126               | 0.3033856   | 4.135576 | (3,-1) | C(1) – H(1A)   |
| 108  | 4.614635               | -1.72519225 | 0.127786 | (3,-1) | C(17) – N(4)   |
| 109  | 8.410806               | -2.45776088 | -1.06151 | (3,-1) | C(18) – H(18A) |
| 110  | 0.018307               | -0.35864791 | 2.630927 | (3,-1) | Pd(1) – N(3)   |



|     |          |             |          |        |                  |
|-----|----------|-------------|----------|--------|------------------|
| 111 | 5.770512 | -0.58959519 | 3.87549  | (3,-1) | H(4A) – C(4)     |
| 112 | -2.43914 | -0.30224592 | 0.544757 | (3,-1) | Pd(1) – N(2)     |
| 113 | -0.12999 | 0.68988262  | 4.893236 | (3,-1) | N(3) – H(3)      |
| 114 | 3.213169 | -1.70954513 | -3.09913 | (3,-1) | H(17B) ... O(1)  |
| 115 | 4.359007 | -0.17513343 | 2.400537 | (3,-1) | C(4) – N(4)      |
| 116 | 2.437865 | -0.11448571 | 0.544523 | (3,-1) | Pd(1) – N(4)     |
| 117 | -5.05214 | 0.76160971  | 0.254633 | (3,-1) | N(2) – C(5)      |
| 118 | -6.92605 | 1.41534019  | 0.329406 | (3,-1) | H(5A) – C(5)     |
| 119 | 4.474816 | 1.15667089  | 3.951092 | (3,-1) | C(4) – H(4B)     |
| 120 | -0.01647 | 0.23004774  | -1.85159 | (3,-1) | Pd(1) – N(1)     |
| 121 | -5.69124 | 1.51237323  | -1.46385 | (3,-1) | C(5) – H(5B)     |
| 122 | 0.799158 | 0.0695472   | -4.07133 | (3,-1) | O(1) – N(1)      |
| 123 | 4.94726  | 1.06948561  | 0.003754 | (3,-1) | N(4) – C(13)     |
| 124 | -3.93892 | 1.50035489  | -2.78131 | (3,-1) | H(5B) ... O(2)   |
| 125 | 3.822251 | 0.60997591  | -3.15315 | (3,-1) | O(1) ... H(13A)  |
| 126 | -0.88006 | 0.96667765  | -3.91275 | (3,-1) | N(1) – O(2)      |
| 127 | -5.17974 | 2.94895727  | 0.285973 | (3,-1) | C(5) – C(6)      |
| 128 | -2.30591 | 2.9685138   | 0.231197 | (3,-1) | H(6B) ... Pd(1)  |
| 129 | 6.769723 | 1.86422108  | -0.08749 | (3,-1) | C(13) – H(13B)   |
| 130 | 5.490564 | 1.59644156  | -1.82588 | (3,-1) | C(13) – H(13A)   |
| 131 | -4.71724 | 4.36899359  | 1.944402 | (3,-1) | H(6A) – C(6)     |
| 132 | 2.07756  | 3.07355619  | -0.24149 | (3,-1) | H(14A) ... Pd(1) |
| 133 | 4.915483 | 3.2505081   | -0.29384 | (3,-1) | C(13) – C(14)    |
| 134 | -3.49404 | 4.3829634   | 0.199286 | (3,-1) | C(6) – H(6B)     |
| 135 | -5.60273 | 5.29373816  | 0.054107 | (3,-1) | C(6) – H(6A)     |
| 136 | 3.129062 | 4.54891147  | -0.51154 | (3,-1) | H(14A) – C(14)   |
| 137 | 4.411841 | 4.87426652  | 1.15399  | (3,-1) | H(14B) – C(14)   |
| 138 | -7.66349 | 6.14328664  | -0.085   | (3,-1) | H(7B) – C(7)     |
| 139 | -6.4286  | 6.1863319   | -1.81898 | (3,-1) | C(7) – H(7A)     |
| 140 | 5.16231  | 5.55394368  | -0.89607 | (3,-1) | C(14) – C(15)    |
| 141 | -5.95442 | 7.65367797  | -0.13137 | (3,-1) | C(7) – C(8)      |
| 142 | 5.860878 | 6.20070667  | -2.91714 | (3,-1) | C(15) – H(15B)   |
| 143 | 7.150985 | 6.505207    | -1.25224 | (3,-1) | C(15) – H(15A)   |
| 144 | -5.53044 | 9.14960822  | 1.521923 | (3,-1) | H(8A) – C(8)     |
| 145 | -4.28933 | 9.19222184  | -0.21854 | (3,-1) | C(8) – H(8B)     |
| 146 | 5.336764 | 7.87623474  | -1.45242 | (3,-1) | C(15) – C(16)    |
| 147 | -6.30675 | 9.89420489  | -0.32574 | (3,-1) | C(8) – H(8C)     |
| 148 | 3.565181 | 9.27047705  | -1.70214 | (3,-1) | C(16) – C(16C)   |
| 149 | 4.859956 | 9.57560158  | -0.0273  | (3,-1) | C(16) – C(16A)   |
| 150 | 5.524207 | 10.07695928 | -1.99726 | (3,-1) | C(16) – C(16B)   |

---

**Table S1.5** List of (3,-1) bond critical points (CPs) generated from theoretical topological analysis of the ES photoactive cation of **1**. Wavefunction calculated with Gaussian-09<sup>3</sup> [B3LYP/SDD for Pd and B3LYP/6-311+G(d) for C, H, N, and O] and CPs searched and visualised using Multiwfn.<sup>4</sup>

| CP # | XYZ Coordinates (Bohr) |          |          | Type   | Atoms          |
|------|------------------------|----------|----------|--------|----------------|
| 73   | -10.7025               | -8.26687 | -2.70173 | (3,-1) | H(12C) – C(12) |
| 74   | -11.2114               | -7.07432 | -0.9996  | (3,-1) | H(12A) – C(12) |
| 75   | -7.19173               | -7.1808  | -1.14082 | (3,-1) | H(11A) – C(11) |
| 76   | -9.23286               | -6.67005 | -2.02853 | (3,-1) | C(12) – C(11)  |
| 77   | -11.2502               | -6.21351 | -2.95758 | (3,-1) | C(12) – H(12B) |
| 78   | -7.233                 | -6.31412 | -3.07918 | (3,-1) | C(11) – H(11B) |
| 79   | 10.70243               | -8.26692 | -2.70174 | (3,-1) | H(20B) – C(20) |
| 80   | 7.191657               | -7.18082 | -1.14086 | (3,-1) | H(19B) – C(19) |
| 81   | -7.65975               | -5.002   | -1.31685 | (3,-1) | C(11) – C(10)  |
| 82   | 11.21136               | -7.07443 | -0.99956 | (3,-1) | H(20A) – C(20) |
| 83   | 9.23281                | -6.6701  | -2.02852 | (3,-1) | C(20) – C(19)  |
| 84   | -2.26888               | -3.26614 | 4.59452  | (3,-1) | H(2A) – C(2)   |
| 85   | -8.07027               | -3.64274 | 0.474946 | (3,-1) | H(10A) – C(10) |
| 86   | 7.232975               | -6.31411 | -3.07921 | (3,-1) | C(19) – H(19A) |
| 87   | -4.02466               | -3.90877 | 0.08521  | (3,-1) | H(9B) – C(9)   |
| 88   | 2.268881               | -3.26613 | 4.59453  | (3,-1) | H(3B) – C(3)   |
| 89   | 11.2502                | -6.21357 | -2.95752 | (3,-1) | C(20) – H(20C) |
| 90   | -2.63549               | -1.9562  | 6.318058 | (3,-1) | H(2B) – C(2)   |
| 91   | -6.1544                | -3.29464 | -0.62456 | (3,-1) | C(10) – C(9)   |
| 92   | 7.659716               | -5.00203 | -1.31684 | (3,-1) | C(19) – C(18)  |
| 93   | 4.024643               | -3.90877 | 0.085234 | (3,-1) | H(17A) – C(17) |
| 94   | 2.63548                | -1.95619 | 6.318067 | (3,-1) | H(3A) – C(3)   |
| 95   | -8.15104               | -2.767   | -1.46435 | (3,-1) | C(10) – H(10B) |
| 96   | -5.70963               | -1.29    | 3.801037 | (3,-1) | H(1B) – C(1)   |
| 97   | -1.47679               | -1.48143 | 4.738006 | (3,-1) | C(2) – N(3)    |
| 98   | -3.46929               | -1.3041  | 4.236124 | (3,-1) | C(2) – C(1)    |
| 99   | -4.16914               | -2.8421  | -1.78276 | (3,-1) | C(9) – H(9A)   |
| 100  | 8.070248               | -3.6428  | 0.474969 | (3,-1) | H(18B) – C(18) |
| 101  | 1.476782               | -1.48143 | 4.738012 | (3,-1) | C(3) – N(3)    |
| 102  | -4.4505                | -1.97013 | -0.0156  | (3,-1) | C(9) – N(2)    |
| 103  | 6.154388               | -3.29467 | -0.62453 | (3,-1) | C(18) – C(17)  |
| 104  | 3.469281               | -1.3041  | 4.236136 | (3,-1) | C(3) – C(4)    |
| 105  | 4.169128               | -2.84211 | -1.78274 | (3,-1) | C(17) – H(17B) |
| 106  | -4.33829               | -0.6023  | 2.409077 | (3,-1) | C(1) – N(2)    |
| 107  | 5.709626               | -1.28999 | 3.801055 | (3,-1) | H(4A) – C(4)   |
| 108  | 4.450491               | -1.97014 | -0.01558 | (3,-1) | C(17) – N(4)   |
| 109  | 8.151033               | -2.76703 | -1.46432 | (3,-1) | C(18) – H(18A) |
| 110  | -1.2E-06               | -0.44256 | 2.711972 | (3,-1) | Pd(1) – N(3)   |
| 111  | -4.65221               | 0.59677  | 4.027171 | (3,-1) | C(1) – H(1A)   |
| 112  | -2.39835               | -0.32992 | 0.584261 | (3,-1) | Pd(1) – N(2)   |
| 113  | 4.338283               | -0.6023  | 2.40909  | (3,-1) | C(4) – N(4)    |
| 114  | -5.1E-06               | 0.622537 | 4.947088 | (3,-1) | N(3) – H(3)    |
| 115  | 2.398349               | -0.32993 | 0.584268 | (3,-1) | Pd(1) – N(4)   |

|     |          |          |          |        |                  |
|-----|----------|----------|----------|--------|------------------|
| 116 | 4.652193 | 0.59678  | 4.027178 | (3,-1) | C(4) – H(4B)     |
| 117 | -4.9064  | 0.816916 | 0.079667 | (3,-1) | N(2) – C(5)      |
| 118 | 5.53E-06 | -0.19377 | -1.83709 | (3,-1) | Pd(1) – O(1A)    |
| 119 | -6.77237 | 1.491894 | -0.09378 | (3,-1) | H(5A) – C(5)     |
| 120 | -5.32945 | 1.521115 | -1.71132 | (3,-1) | C(5) – H(5B)     |
| 121 | 4.906405 | 0.8169   | 0.07967  | (3,-1) | N(4) – C(13)     |
| 122 | 1.42E-06 | 0.764202 | -4.16759 | (3,-1) | O(1A) – N(1A)    |
| 123 | 6.772389 | 1.491866 | -0.09379 | (3,-1) | H(13B) – C(13)   |
| 124 | -5.01568 | 3.024749 | 0.044152 | (3,-1) | C(5) – C(6)      |
| 125 | -2.17382 | 2.944062 | 0.268807 | (3,-1) | Pd(1) ... H(6B)  |
| 126 | 5.329459 | 1.52108  | -1.71133 | (3,-1) | C(13) – H(13A)   |
| 127 | -1E-05   | 2.286559 | -2.13512 | (3,-1) | Pd(1) ... O(2A)  |
| 128 | -2.86043 | 2.495311 | -2.75241 | (3,-1) | H(5B) ... O(2A)  |
| 129 | 2.173841 | 2.944055 | 0.268786 | (3,-1) | Pd(1) ... H(14A) |
| 130 | -4.85502 | 4.506161 | 1.692769 | (3,-1) | H(6A) – C(6)     |
| 131 | 2.860424 | 2.495269 | -2.75245 | (3,-1) | H(13A) ... O(2A) |
| 132 | 5.015704 | 3.024732 | 0.044135 | (3,-1) | C(13) – C(14)    |
| 133 | -1.1E-05 | 2.553902 | -4.31788 | (3,-1) | N(1A) – O(2A)    |
| 134 | -3.31015 | 4.422125 | 0.209293 | (3,-1) | C(6) – H(6B)     |
| 135 | -1.573   | 3.960236 | -1.46794 | (3,-1) | H(6B) ... O(2A)  |
| 136 | 1.573    | 3.960233 | -1.46796 | (3,-1) | O(2A) ... H(14A) |
| 137 | 4.855042 | 4.50616  | 1.692738 | (3,-1) | H(14B) – C(14)   |
| 138 | 3.310181 | 4.422114 | 0.209263 | (3,-1) | C(14) – H(14A)   |
| 139 | -5.33678 | 5.34725  | -0.37517 | (3,-1) | C(6) – C(7)      |
| 140 | -7.31665 | 6.204588 | -0.9622  | (3,-1) | H(7B) – C(7)     |
| 141 | 5.336814 | 5.347227 | -0.37521 | (3,-1) | C(14) – C(15)    |
| 142 | -5.75243 | 6.172321 | -2.40723 | (3,-1) | C(7) – H(7A)     |
| 143 | -5.61049 | 7.701312 | -0.71581 | (3,-1) | C(7) – C(8)      |
| 144 | 7.31669  | 6.204545 | -0.96225 | (3,-1) | H(15A) – C(15)   |
| 145 | 5.752457 | 6.172286 | -2.40727 | (3,-1) | C(15) – H(15B)   |
| 146 | -5.50336 | 9.255948 | 0.933    | (3,-1) | H(8A) – C(8)     |
| 147 | 5.610539 | 7.701285 | -0.71586 | (3,-1) | C(15) – C(16)    |
| 148 | -3.93945 | 9.220651 | -0.52758 | (3,-1) | C(8) – H(8B)     |
| 149 | 2.89E-05 | 9.191332 | -0.59044 | (3,-1) | H(8B) ... H(16C) |
| 150 | -5.88538 | 9.932486 | -1.05942 | (3,-1) | C(8) – H(8C)     |
| 151 | 5.50347  | 9.255939 | 0.932936 | (3,-1) | H(16A) – C(16)   |
| 152 | 3.939515 | 9.220631 | -0.52759 | (3,-1) | C(16) – H(16C)   |
| 153 | 5.885424 | 9.932454 | -1.0595  | (3,-1) | C(16) – H(16B)   |

**Table S1.6** Theoretical Natural Bond Orbital (NBO) analysis for the covalent bonds in the GS nitro-( $\eta^1$ -NO<sub>2</sub>) and ES nitrito-( $\eta^1$ -ONO) ligands of **1**, calculated with Gaussian-09<sup>3</sup> [B3LYP/SDD for Pd and B3LYP/6-311+G(d) for C, H, N, and O)].

|           | Bond          | Occupancy [electrons] | Localisation weights [atom type (%)] | Bond type           |
|-----------|---------------|-----------------------|--------------------------------------|---------------------|
| <b>GS</b> | N(1) – O(1)   | (i) 1.98939           | (i) N (48.62%), O (51.4%)            | (i) $\sigma$ (N-O)  |
|           |               | (ii) 1.98298          | (ii) N (44.8%), O (55.9%)            | (ii) $\pi$ (N-O)    |
|           | N(1) – O(2)   | 1.98928               | N (49.7%), O (50.3%)                 | $\sigma$ (N-O)      |
| <b>ES</b> | N(1A) – O(1A) | 1.97594               | N (39.6%), O (60.4%)                 | $\sigma$ (N-O)      |
|           | N(1A) – O(2A) | (i) 1.99581           | (i) N (35.4%), O (64.6%)             | (i) $\pi$ (N-O)     |
|           |               | (ii) 1.99027          | (ii) N (44.2%), O (55.8%)            | (ii) $\sigma$ (N-O) |

**Table S1.7** Calculated Wiberg bond orders/indices from Natural Bond Orbital (NBO) analysis for selected bonds in the GS nitro-( $\eta^1$ -NO<sub>2</sub>) and ES nitrito-( $\eta^1$ -ONO) isomers of **1**, calculated with Gaussian-09<sup>3</sup> [B3LYP/SDD for Pd and B3LYP/6-311+G(d) for C, H, N, and O)].

| <b>GS</b>    |            | <b>ES</b>     |            |
|--------------|------------|---------------|------------|
| Bond         | Bond order | Bond          | Bond order |
| Pd(1) – N(1) | 0.8783     | Pd(1) – O(1A) | 0.8282     |
| Pd(1) – N(2) | 0.3794     | Pd(1) – N(2)  | 0.4387     |
| Pd(1) – N(3) | 0.6327     | Pd(1) – N(3)  | 0.5879     |
| Pd(1) – N(4) | 0.3755     | Pd(1) – N(4)  | 0.4387     |
| N(1) – O(1)  | 1.4392     | N(1A) – O(1A) | 1.1751     |
| N(1) – O(2)  | 1.4456     | N(1A) – O(2A) | 1.7825     |

(a)

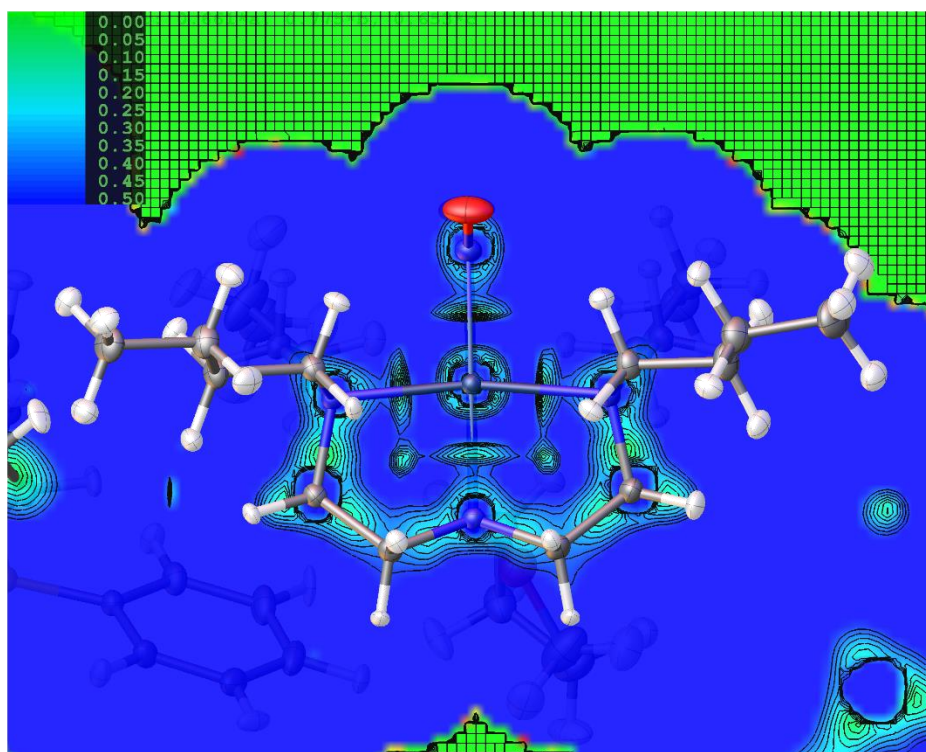

(b)

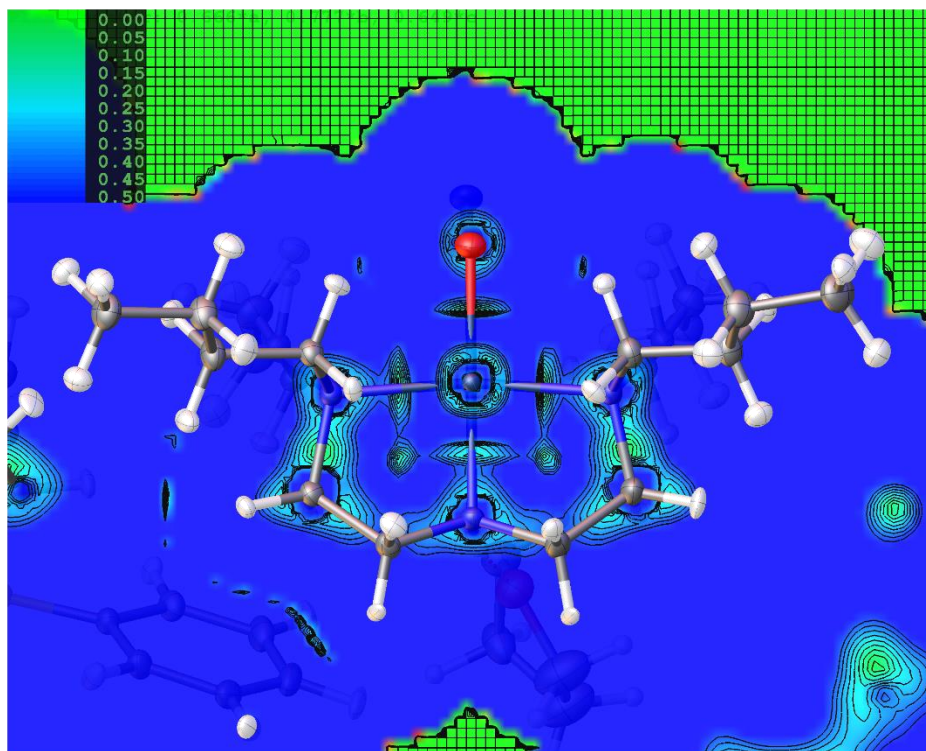

**Figure S1.3** Reduced density gradient (RDG,  $s$ ) 2D plots in the Pd(1), N(2), N(3), N(4) plane for the GS (a) and ES (b) of **1**, showing non-covalent interaction (NCI) features generated by HAR analysis in NoSpherA2.<sup>2</sup>

## Supplementary Movies for Complex 1

### SupplementaryMovie1.gif

Rotating 3D deformation density map for Complex 1 in the GS nitro-( $\eta^1$ -NO<sub>2</sub>) isomer.

<https://doi.org/10.6084/m9.figshare.21586767>

### SupplementaryMovie2.gif

Rotating 3D deformation density map for Complex 1 in the ES nitrito-( $\eta^1$ -QNO) isomer.

<https://doi.org/10.6084/m9.figshare.21586773>

### SupplementaryMovie3.gif

Rotating 3D Laplacian map for Complex 1 in the GS nitro-( $\eta^1$ -NO<sub>2</sub>) isomer.

<https://doi.org/10.6084/m9.figshare.21586782>

### SupplementaryMovie4.gif

Rotating 3D Laplacian map for Complex 1 in the ES nitrito-( $\eta^1$ -QNO) isomer.

<https://doi.org/10.6084/m9.figshare.21586785>

Supplementary movies can be accessed on FigShare via the links provided.

## 2. Complex 2: [Ni(Et<sub>4</sub>dien)(NO<sub>2</sub>)<sub>2</sub>].

(a)

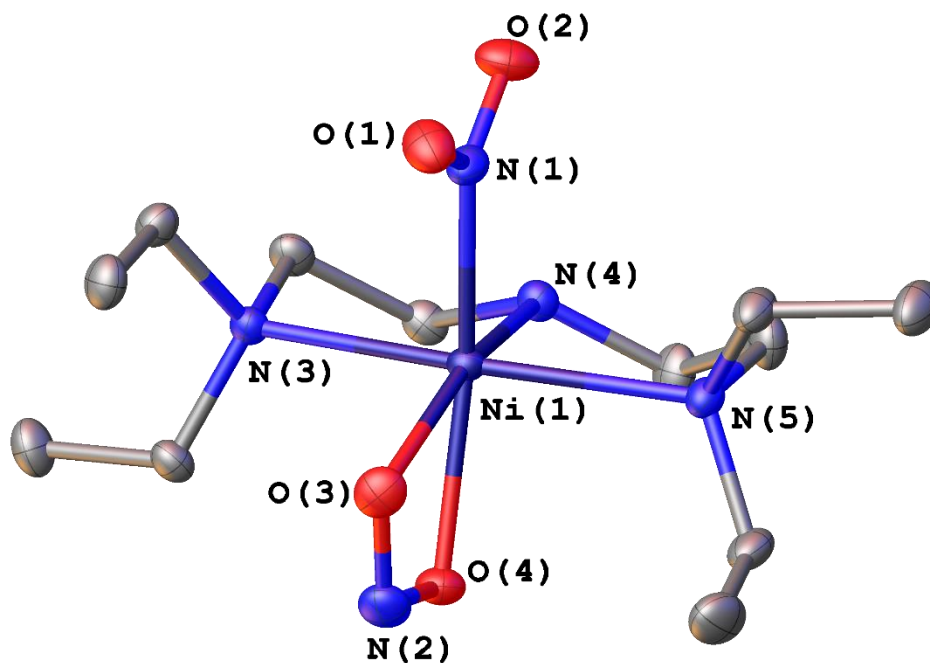

(b)

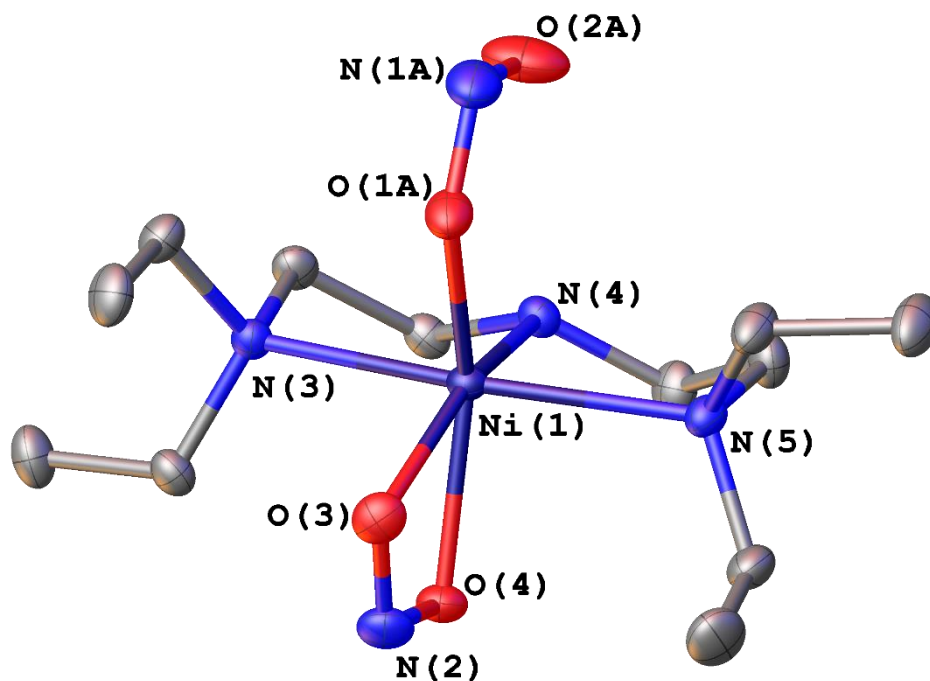

**Figure S2.1** Single crystal X-ray structures showing the atomic connectivity in the asymmetric units of the ground state (a) and 100% photoexcited state (b) isomers of **2**,<sup>5</sup> with selected non-hydrogen atoms labelled. Ellipsoids are shown and 50% probability and hydrogen atoms are removed for clarity.

**Table S2.1** Single-crystal X-ray structure data for **2** collected for HAR using NoSpherA2 in Olex2.<sup>2</sup>

|                                                              | Ground state (GS)                                                            | Excited state (ES)                                                           |
|--------------------------------------------------------------|------------------------------------------------------------------------------|------------------------------------------------------------------------------|
| Photoexcitation level/%                                      | 0                                                                            | 100                                                                          |
| Empirical formula                                            | C <sub>12</sub> H <sub>29</sub> N <sub>5</sub> NiO <sub>4</sub>              | C <sub>12</sub> H <sub>29</sub> N <sub>5</sub> NiO <sub>4</sub>              |
| Formula weight                                               | 366.089                                                                      | 366.089                                                                      |
| Temperature/K                                                | 100(1)                                                                       | 100(1)                                                                       |
| Crystal system                                               | Orthorhombic                                                                 | Orthorhombic                                                                 |
| Space group                                                  | <i>P</i> 2 <sub>1</sub> 2 <sub>1</sub> 2 <sub>1</sub>                        | <i>P</i> 2 <sub>1</sub> 2 <sub>1</sub> 2 <sub>1</sub>                        |
| <i>a</i> /Å                                                  | 11.29901(16)                                                                 | 11.5006(2)                                                                   |
| <i>b</i> /Å                                                  | 11.5909(2)                                                                   | 11.6540(2)                                                                   |
| <i>c</i> /Å                                                  | 12.83109(18)                                                                 | 12.8103(2)                                                                   |
| $\alpha$ /°                                                  | 90                                                                           | 90                                                                           |
| $\beta$ /°                                                   | 90                                                                           | 90                                                                           |
| $\gamma$ /°                                                  | 90                                                                           | 90                                                                           |
| Volume/Å <sup>3</sup>                                        | 1680.43(4)                                                                   | 1716.94(5)                                                                   |
| <i>Z</i>                                                     | 4                                                                            | 4                                                                            |
| $\rho_{\text{calc}}/\text{gcm}^{-3}$                         | 1.447                                                                        | 1.416                                                                        |
| $\mu/\text{mm}^{-1}$                                         | 1.179                                                                        | 1.154                                                                        |
| <i>F</i> (000)                                               | 786.0                                                                        | 786.0                                                                        |
| Radiation                                                    | Mo K $\alpha$ ( $\lambda$ = 0.71073)                                         | Mo K $\alpha$ ( $\lambda$ = 0.71073)                                         |
| 2 $\theta$ range for data collection/°                       | 7.26 to 72.62                                                                | 7.26 to 72.64                                                                |
| Completeness (resolution)                                    | 0.9960 (0.6 Å)                                                               | 0.9955 (0.6 Å)                                                               |
| Reflections collected                                        | 12104                                                                        | 16753                                                                        |
| Independent reflections                                      | 7857 [ <i>R</i> <sub>int</sub> = 0.0236, <i>R</i> <sub>sigma</sub> = 0.0440] | 8292 [ <i>R</i> <sub>int</sub> = 0.0270, <i>R</i> <sub>sigma</sub> = 0.0410] |
| Data/restraints/parameters                                   | 7857/147/460                                                                 | 8292/147/460                                                                 |
| Goodness-of-fit on <i>F</i> <sup>2</sup>                     | 1.064                                                                        | 1.030                                                                        |
| Final <i>R</i> indexes [ <i>I</i> ≥ 2 $\sigma$ ( <i>I</i> )] | <i>R</i> <sub>1</sub> = 0.0304, <i>wR</i> <sub>2</sub> = 0.0588              | <i>R</i> <sub>1</sub> = 0.0303, <i>wR</i> <sub>2</sub> = 0.0595              |
| Final <i>R</i> indexes [all data]                            | <i>R</i> <sub>1</sub> = 0.0367, <i>wR</i> <sub>2</sub> = 0.0625              | <i>R</i> <sub>1</sub> = 0.0375, <i>wR</i> <sub>2</sub> = 0.0631              |
| Largest diff. peak/hole / e Å <sup>-3</sup>                  | 0.46/-0.32                                                                   | 0.50/-0.25                                                                   |
| Flack parameter                                              | 0.003(5)                                                                     | -0.007(5)                                                                    |



**Table S2.2** Experimental bond lengths for non-hydrogen atoms determined by single-crystal X-ray diffraction of the photoactive [Ni(Et<sub>4</sub>dien)(NO<sub>2</sub>)<sub>2</sub>] molecule (**2**), in the ground state (GS) at 100 K. All bond lengths are all given in Å.

| Atom  | Atom  | Length/Å   | Atom  | Atom  | Length/Å   |
|-------|-------|------------|-------|-------|------------|
| Ni(1) | N(4)  | 2.0162(10) | N(5)  | C(4)  | 1.4887(17) |
| Ni(1) | N(5)  | 2.2899(11) | N(3)  | C(5)  | 1.4902(16) |
| Ni(1) | N(3)  | 2.2743(11) | N(3)  | C(7)  | 1.4884(16) |
| Ni(1) | O(3)  | 2.1000(9)  | N(3)  | C(1)  | 1.4841(16) |
| Ni(1) | O(4)  | 2.1112(9)  | N(2)  | O(3)  | 1.2605(16) |
| Ni(1) | N(1)  | 2.0295(11) | N(2)  | O(4)  | 1.2565(15) |
| O(2)  | N(1)  | 1.2521(15) | C(5)  | C(6)  | 1.5141(18) |
| C(3)  | N(4)  | 1.4623(17) | C(7)  | C(8)  | 1.524(2)   |
| C(3)  | C(4)  | 1.515(2)   | C(9)  | C(10) | 1.529(2)   |
| N(4)  | C(2)  | 1.4682(18) | C(12) | C(11) | 1.521(2)   |
| N(5)  | C(9)  | 1.4858(17) | O(1)  | N(1)  | 1.2260(14) |
| N(5)  | C(11) | 1.4891(17) | C(2)  | C(1)  | 1.5151(19) |

**Table S2.3** Experimental bond lengths for non-hydrogen atoms determined by single-crystal X-ray diffraction of the photoactive [Ni(Et<sub>4</sub>dien)(NO<sub>2</sub>)<sub>2</sub>] molecule (**2**), in the excited state (ES) at 100 K. All bond lengths are all given in Å.

| Atom  | Atom  | Length/Å   | Atom  | Atom  | Length/Å   |
|-------|-------|------------|-------|-------|------------|
| Ni(1) | O(1A) | 2.0074(9)  | N(3)  | C(7)  | 1.4904(16) |
| Ni(1) | O(3)  | 2.1080(9)  | N(4)  | C(2)  | 1.4688(16) |
| Ni(1) | O(4)  | 2.1221(9)  | N(4)  | C(3)  | 1.4628(16) |
| Ni(1) | N(3)  | 2.2792(10) | N(5)  | C(4)  | 1.4864(16) |
| Ni(1) | N(4)  | 2.0223(10) | N(5)  | C(9)  | 1.4853(16) |
| Ni(1) | N(5)  | 2.2997(10) | N(5)  | C(11) | 1.4912(17) |
| O(1A) | N(1A) | 1.2674(16) | C(1)  | C(2)  | 1.5099(18) |
| O(2A) | N(1A) | 1.2070(17) | C(3)  | C(4)  | 1.512(2)   |
| O(3)  | N(2)  | 1.2583(14) | C(5)  | C(6)  | 1.5146(19) |
| O(4)  | N(2)  | 1.2575(13) | C(7)  | C(8)  | 1.525(2)   |
| N(3)  | C(1)  | 1.4887(15) | C(9)  | C(10) | 1.527(2)   |
| N(3)  | C(5)  | 1.4841(15) | C(11) | C(12) | 1.519(2)   |

(a)

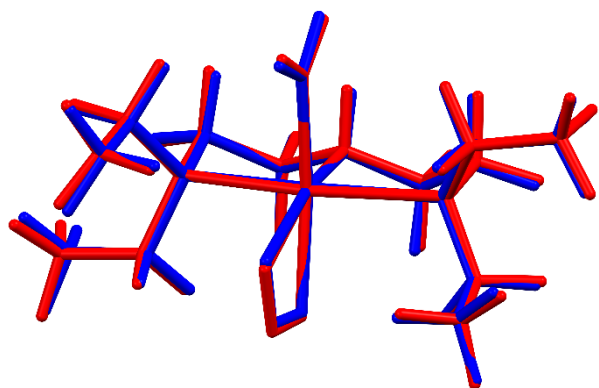

GS nitro-( $\eta^1\text{-NO}_2$ ): RMSD = 0.0926

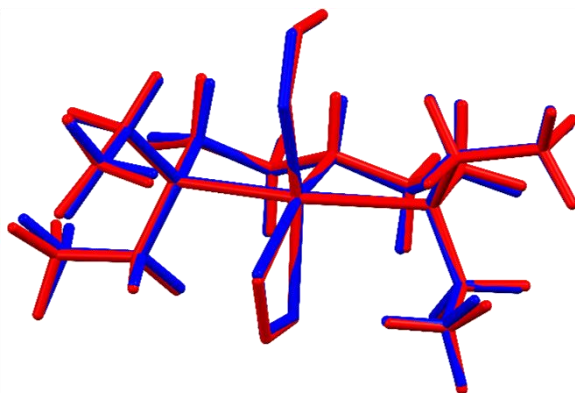

ES nitrito-( $\eta^1\text{-ONO}$ ): RMSD = 0.1022

(b)

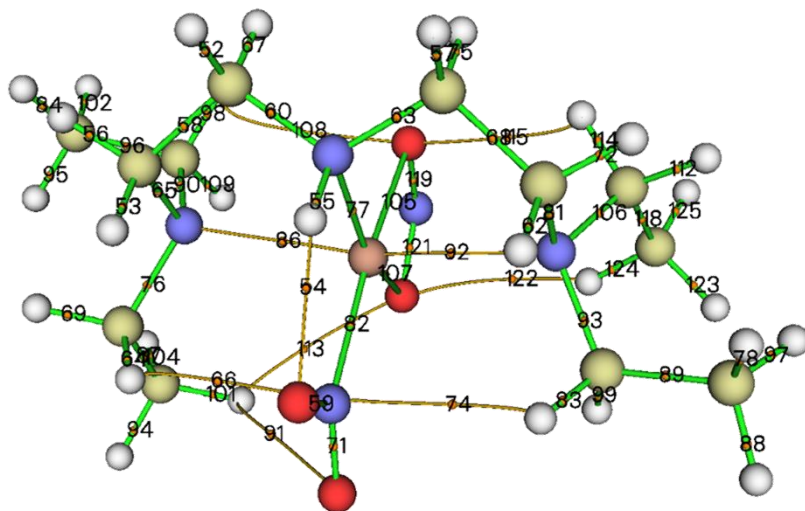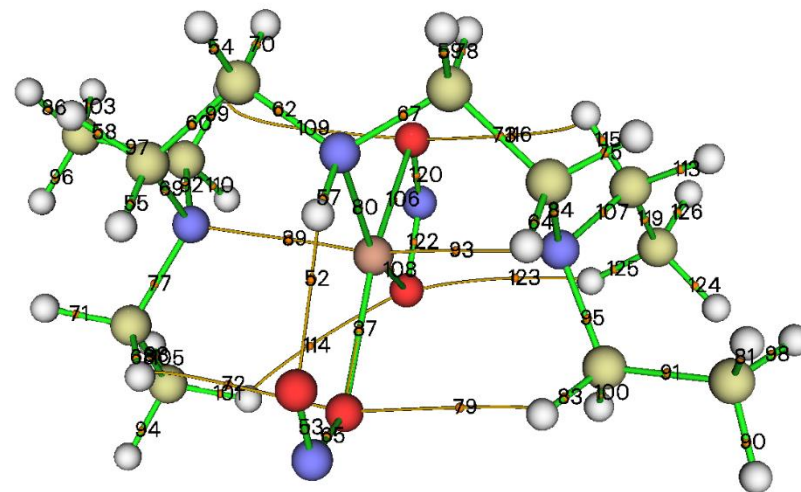



**Table S2.4** List of (3,-1) bond critical points (CPs) generated from theoretical topological analysis of the GS molecule of **2**. Wavefunction calculated with Gaussian-09<sup>3</sup> [B3LYP/SDD for Ni and B3LYP/6-311+G(d) for C, H, N, and O] and CPs searched and visualised using Multiwfn.<sup>4</sup>

| CP # | XYZ Coordinates (Bohr) |          |          | Type   | Atoms          |
|------|------------------------|----------|----------|--------|----------------|
| 52   | -2.53093               | -2.87384 | 5.210817 | (3,-1) | H(2A) – C(2)   |
| 53   | -4.33424               | -3.53372 | 1.726293 | (3,-1) | H(1B) – C(1)   |
| 54   | 0.253341               | -4.23859 | 0.728009 | (3,-1) | O(2) ... H(4)  |
| 55   | 0.148758               | -3.38821 | 2.310049 | (3,-1) | H(4) – N(4)    |
| 56   | -5.69803               | -2.35854 | 2.899407 | (3,-1) | H(1A) – C(1)   |
| 57   | 2.446156               | -2.43864 | 5.444634 | (3,-1) | H(3B) – C(3)   |
| 58   | -3.46917               | -2.13233 | 3.260304 | (3,-1) | C(1) – C(2)    |
| 59   | 0.299691               | -3.92998 | -2.07032 | (3,-1) | O(2) – N(1)    |
| 60   | -1.42837               | -2.02344 | 3.743065 | (3,-1) | C(2) – N(4)    |
| 62   | 4.614263               | -2.96263 | 2.16532  | (3,-1) | H(4B) – C(4)   |
| 63   | 1.371031               | -1.79772 | 3.856921 | (3,-1) | N(4) – C(3)    |
| 64   | -4.92864               | -2.58418 | -2.37788 | (3,-1) | H(5A) – C(5)   |
| 65   | -4.49153               | -1.53051 | 1.449098 | (3,-1) | C(1) – N(3)    |
| 66   | -2.53373               | -2.81636 | -2.43892 | (3,-1) | H(5A) ... N(1) |
| 67   | -2.50876               | -0.74994 | 4.831922 | (3,-1) | C(2) – H(2B)   |
| 68   | 3.438557               | -1.63869 | 3.54768  | (3,-1) | C(3) – C(4)    |
| 69   | -6.859                 | -1.8704  | -1.7901  | (3,-1) | H(5B) – C(5)   |
| 71   | 0.263288               | -2.84907 | -3.59145 | (3,-1) | N(1) – O(1)    |
| 72   | 5.697982               | -1.55579 | 3.387227 | (3,-1) | C(4) – H(4A)   |
| 74   | 2.934756               | -2.58449 | -2.24963 | (3,-1) | N(1) ... H(9A) |
| 75   | 2.167902               | -0.34914 | 4.973205 | (3,-1) | C(3) – H(3A)   |
| 76   | -5.15125               | -1.04429 | -1.12319 | (3,-1) | C(5) – N(3)    |
| 77   | -0.01134               | -0.87799 | 1.301336 | (3,-1) | N(4) – Ni(1)   |
| 78   | 8.940855               | -2.22897 | -0.42102 | (3,-1) | H(10C) – C(10) |
| 81   | 4.534622               | -0.96553 | 1.795995 | (3,-1) | C(4) – N(5)    |
| 82   | 0.096929               | -1.28221 | -1.28689 | (3,-1) | N(1) – Ni(1)   |
| 83   | 5.247024               | -2.08151 | -2.01155 | (3,-1) | H(9A) – C(9)   |
| 84   | -8.91659               | 1.035383 | 2.382587 | (3,-1) | H(8B) – C(8)   |
| 86   | -2.04373               | -0.11847 | 0.057703 | (3,-1) | N(3) – Ni(1)   |
| 87   | -5.61845               | -0.55613 | -3.22295 | (3,-1) | C(5) – C(6)    |
| 88   | 9.159984               | -1.83686 | -2.50228 | (3,-1) | H(10A) – C(10) |
| 89   | 7.256941               | -1.12885 | -1.5084  | (3,-1) | C(10) – C(9)   |
| 90   | -5.19561               | 0.987451 | 0.733244 | (3,-1) | N(3) – C(7)    |
| 91   | -2.16339               | -0.76363 | -4.66325 | (3,-1) | O(1) ... H(6C) |
| 92   | 2.0118                 | 0.102642 | 0.200243 | (3,-1) | Ni(1) – N(5)   |
| 93   | 5.290524               | -0.51374 | -0.76429 | (3,-1) | C(9) – N(5)    |
| 94   | -6.07407               | -0.37463 | -5.39393 | (3,-1) | H(6A) – C(6)   |
| 95   | -9.21129               | 1.646599 | 0.358841 | (3,-1) | H(8A) – C(8)   |
| 96   | -7.122                 | 1.920773 | 1.260787 | (3,-1) | C(8) – C(7)    |
| 97   | 9.330833               | -0.2423  | -1.0981  | (3,-1) | C(10) – H(10B) |
| 98   | -5.07949               | 2.382864 | 2.177644 | (3,-1) | C(7) – H(7A)   |
| 99   | 5.602186               | -0.08851 | -2.70759 | (3,-1) | C(9) – H(9B)   |
| 101  | -4.39638               | 0.729914 | -4.62459 | (3,-1) | C(6) – H(6C)   |

|     |          |          |          |        |                 |
|-----|----------|----------|----------|--------|-----------------|
| 102 | -8.93775 | 3.102755 | 1.890764 | (3,-1) | C(8) – H(8C)    |
| 104 | -6.41369 | 1.331077 | -4.16569 | (3,-1) | C(6) – H(6B)    |
| 105 | -0.16046 | 1.950131 | 0.575312 | (3,-1) | Ni(1) – O(4)    |
| 106 | 5.056985 | 1.557666 | 1.039033 | (3,-1) | N(5) – C(11)    |
| 107 | -0.19567 | 1.812241 | -1.22261 | (3,-1) | Ni(1) – O(3)    |
| 108 | -2.9103  | 3.053842 | 1.774468 | (3,-1) | H(7A) ... O(4)  |
| 109 | -5.39569 | 2.904435 | 0.137965 | (3,-1) | C(7) – H(7B)    |
| 112 | 6.610717 | 2.390647 | 2.011762 | (3,-1) | H(11B) – C(11)  |
| 113 | -2.44947 | 2.017477 | -3.62156 | (3,-1) | H(6C) ... O(3)  |
| 114 | 4.594733 | 3.067936 | 2.291954 | (3,-1) | C(11) – H(11A)  |
| 115 | 2.327879 | 3.460958 | 2.025198 | (3,-1) | H(11A) ... O(4) |
| 118 | 5.635055 | 3.569112 | 0.303952 | (3,-1) | C(11) – C(12)   |
| 119 | -0.40723 | 4.437441 | 0.352377 | (3,-1) | O(4) – N(2)     |
| 121 | -0.42554 | 4.286265 | -1.42114 | (3,-1) | O(3) – N(2)     |
| 122 | 2.301282 | 4.287022 | -1.92421 | (3,-1) | O(3) ... H(12A) |
| 123 | 6.855954 | 4.250926 | -1.46918 | (3,-1) | C(12) – H(12C)  |
| 124 | 4.751793 | 4.661507 | -1.47796 | (3,-1) | C(12) – H(12A)  |
| 125 | 6.057793 | 5.71533  | -0.14549 | (3,-1) | C(12) – H(12B)  |

**Table S2.5** List of (3,-1) bond critical points (CPs) generated from theoretical topological analysis of the ES molecule of **2**. Wavefunction calculated with Gaussian-09<sup>3</sup> [B3LYP/SDD for Ni and B3LYP/6-311+G(d) for C, H, N, and O] and CPs searched and visualised using Multiwfn.<sup>4</sup>

| CP # | XYZ Coordinates (Bohr) |          |          | Type   | Atoms           |
|------|------------------------|----------|----------|--------|-----------------|
| 52   | 0.306823               | -4.3973  | 0.871913 | (3,-1) | O(2A) ... H(4)  |
| 53   | 0.429853               | -5.14547 | -2.16974 | (3,-1) | O(2A) – N(1A)   |
| 54   | -2.52241               | -2.73518 | 5.163717 | (3,-1) | H(2A) – C(2)    |
| 55   | -4.32556               | -3.45044 | 1.687351 | (3,-1) | H(1B) – C(1)    |
| 57   | 0.16178                | -3.30391 | 2.27956  | (3,-1) | H(4) – N(4)     |
| 58   | -5.69168               | -2.2633  | 2.844855 | (3,-1) | H(1A) – C(1)    |
| 59   | 2.454553               | -2.27989 | 5.386912 | (3,-1) | H(3B) – C(3)    |
| 60   | -3.46266               | -2.02662 | 3.202333 | (3,-1) | C(1) – C(2)     |
| 62   | -1.42125               | -1.90851 | 3.680529 | (3,-1) | C(2) – N(4)     |
| 64   | 4.618679               | -2.8326  | 2.106634 | (3,-1) | H(4A) – C(4)    |
| 65   | 0.299612               | -3.59194 | -3.09968 | (3,-1) | N(1A) – O(1A)   |
| 67   | 1.373682               | -1.67061 | 3.789919 | (3,-1) | N(4) – C(3)     |
| 68   | -4.86699               | -2.54568 | -2.43894 | (3,-1) | H(5A) – C(5)    |
| 69   | -4.4868                | -1.45157 | 1.383978 | (3,-1) | C(1) – N(3)     |
| 70   | -2.5036                | -0.6173  | 4.74896  | (3,-1) | C(2) – H(2B)    |
| 71   | -6.81635               | -1.8513  | -1.87949 | (3,-1) | H(5B) – C(5)    |
| 72   | -2.54547               | -2.55301 | -2.75672 | (3,-1) | H(5A) ... O(1A) |
| 73   | 3.439556               | -1.49982 | 3.478012 | (3,-1) | C(3) – C(4)     |
| 75   | 5.699038               | -1.40714 | 3.311036 | (3,-1) | (C4) – H(4B)    |
| 77   | -5.12566               | -1.00061 | -1.20111 | (3,-1) | C(5) – N(3)     |
| 78   | 2.161264               | -0.19882 | 4.885157 | (3,-1) | C(3) – H(3A)    |
| 79   | 2.910391               | -2.2527  | -2.58716 | (3,-1) | O(1A) ... H(9A) |
| 80   | -0.00999               | -0.78333 | 1.241593 | (3,-1) | N(4) – Ni(1)    |
| 81   | 8.89745                | -2.14667 | -0.53181 | (3,-1) | H(10C) – C(10)  |
| 83   | 5.185791               | -1.97452 | -2.0988  | (3,-1) | H(9A) – C(9)    |
| 84   | 4.527718               | -0.8391  | 1.718153 | (3,-1) | C(4) – N(5)     |
| 86   | -8.95378               | 1.075562 | 2.228895 | (3,-1) | H(8A) – C(8)    |
| 87   | 0.081479               | -0.99263 | -1.63121 | (3,-1) | O(1A) – Ni(1)   |
| 88   | -5.57108               | -0.53913 | -3.30682 | (3,-1) | C(5) – C(6)     |
| 89   | -2.04224               | -0.04045 | -0.01019 | (3,-1) | N(3) – Ni(1)    |
| 90   | 9.103055               | -1.76747 | -2.61637 | (3,-1) | H(10A) – C(10)  |
| 91   | 7.211682               | -1.04016 | -1.61195 | (3,-1) | C(10) – C(9)    |
| 92   | -5.20998               | 1.04875  | 0.632895 | (3,-1) | N(3) – C(7)     |
| 93   | 2.002864               | 0.207679 | 0.128372 | (3,-1) | Ni(1) – N(4)    |
| 94   | -5.9997                | -0.37816 | -5.48712 | (3,-1) | H(6A) – C(6)    |
| 95   | 5.257854               | -0.40819 | -0.8551  | (3,-1) | C(9) – N(5)     |
| 96   | -9.22553               | 1.668861 | 0.197053 | (3,-1) | H(8C) – C(8)    |
| 97   | -7.15137               | 1.969342 | 1.12581  | (3,-1) | C(8) – C(7)     |
| 98   | 9.295911               | -0.16669 | -1.22317 | (3,-1) | C(10) – H(10B)  |
| 99   | -5.12697               | 2.455823 | 2.068453 | (3,-1) | C(7) – H(7A)    |
| 100  | 5.55672                | 0.008895 | -2.79952 | (3,-1) | C(9) – C(9B)    |
| 101  | -4.34128               | 0.744479 | -4.7011  | (3,-1) | C(6) – H(6C)    |
| 103  | -8.98747               | 3.139007 | 1.721393 | (3,-1) | C(8) – H(8B)    |

|     |          |          |          |        |                 |
|-----|----------|----------|----------|--------|-----------------|
| 105 | -6.36823 | 1.335323 | -4.28043 | (3,-1) | C(6) – H(6B)    |
| 106 | -0.17206 | 2.001866 | 0.536634 | (3,-1) | Ni(1) – O(4)    |
| 107 | 5.045494 | 1.675445 | 0.934125 | (3,-1) | N(5) – C(11)    |
| 108 | -0.21095 | 1.913155 | -1.25261 | (3,-1) | Ni(1) – O(3)    |
| 109 | -2.9427  | 3.109395 | 1.74688  | (3,-1) | H(7A) ... O(4)  |
| 110 | -5.41862 | 2.959882 | 0.020194 | (3,-1) | C(7) – H(7B)    |
| 113 | 6.610967 | 2.514013 | 1.883946 | (3,-1) | H(11B) – C(11)  |
| 114 | -2.42974 | 2.08194  | -3.6517  | (3,-1) | H(6C) ... O(3)  |
| 115 | 4.598953 | 3.194952 | 2.182208 | (3,-1) | C(11) – H(11A)  |
| 116 | 2.321579 | 3.549487 | 1.979804 | (3,-1) | H(11A) ... O(4) |
| 119 | 5.618262 | 3.681788 | 0.180076 | (3,-1) | C(11) – C(12)   |
| 120 | -0.43256 | 4.494361 | 0.38577  | (3,-1) | O(4) – N(2)     |
| 122 | -0.45423 | 4.392712 | -1.39174 | (3,-1) | O(3) – N(2)     |
| 123 | 2.278513 | 4.375142 | -2.01687 | (3,-1) | O(3) ... H(12A) |
| 124 | 6.821046 | 4.350758 | -1.61081 | (3,-1) | C(12) – H(12C)  |
| 125 | 4.716977 | 4.765286 | -1.59947 | (3,-1) | C(12) – H(12A)  |
| 126 | 6.040169 | 5.824848 | -0.28855 | (3,-1) | C(12) – H(12B)  |

**Table S2.6** Theoretical Natural Bond Orbital (NBO) analysis for the covalent bonds in the GS nitro-( $\eta^1$ -NO<sub>2</sub>) and ES nitrito-( $\eta^1$ -ONO) ligands of **2**, calculated with Gaussian-09<sup>3</sup> [B3LYP/SDD for Ni and B3LYP/6-311+G(d) for C, H, N, and O)].

|    | Bond          | Spin     | Occupancy [electrons] | Localisation weights [atom type (%)] | Bond type           |
|----|---------------|----------|-----------------------|--------------------------------------|---------------------|
| GS | N(1) – O(1)   | $\alpha$ | 0.99657               | N (45.0%), O (55.0%)                 | $\sigma$ (N-O)      |
|    | N(1) – O(2)   | $\alpha$ | 0.99585               | N (45.5%), O (54.5%)                 | $\sigma$ (N-O)      |
|    | N(1) – O(1)   | $\beta$  | (i) 0.99270           | (i) N (44.1%), O (55.9%)             | (i) $\sigma$ (N-O)  |
|    |               | $\beta$  | (ii) 0.99526          | (ii) N (30.8%), O (69.2%)            | (ii) $\pi$ (N-O)    |
|    |               | $\beta$  | (iii) 0.94078         | (iii) N (58.3%), O (41.7%)           | (ii) $\pi$ (N-O)    |
|    | N(1) – O(2)   | $\beta$  | 0.97874               | N (52.0%), O (48.0%)                 | $\sigma$ (N-O)      |
| ES | N(1A) – O(1A) | $\alpha$ | 0.99514               | N (43.0%), O (57.0%)                 | $\sigma$ (N-O)      |
|    | N(1A) – O(2A) | $\alpha$ | 0.99631               | N (43.4%), O (56.6%)                 | $\sigma$ (N-O)      |
|    | N(1A) – O(1A) | $\beta$  | 0.98813               | N (48.2%), O (51.8%)                 | $\sigma$ (N-O)      |
|    |               | $\beta$  | (i) 0.99625           | (i) N (25.6%), O (73.4%)             | (i) $\pi$ (N-O)     |
|    |               | $\beta$  | (ii) 0.98829          | (ii) N (44.0%), O (56.0%)            | (ii) $\sigma$ (N-O) |
|    | N(1A) – O(2A) | $\beta$  | (iii) 0.98185         | (iii) N (42.7%), O (57.3%)           | (iii) $\pi$ (N-O)   |

**Table S2.7** Calculated Wiberg bond orders/indices from Natural Bond Orbital (NBO) analysis for selected bonds in the GS nitro-( $\eta^1$ -NO<sub>2</sub>) and ES nitrito-( $\eta^1$ -ONO) isomers of **2**, calculated with Gaussian-09<sup>3</sup> [B3LYP/SDD for Ni and B3LYP/6-311+G(d) for C, H, N, and O)].

| GS           |            | ES            |            |
|--------------|------------|---------------|------------|
| Bond         | Bond order | Bond          | Bond order |
| Ni(1) – N(1) | 0.2177     | Ni(1) – O(1A) | 0.2266     |
| Ni(1) – N(3) | 0.1393     | Ni(1) – N(3)  | 0.1331     |
| Ni(1) – N(4) | 0.2040     | Ni(1) – N(4)  | 0.1992     |
| Ni(1) – N(5) | 0.1360     | Ni(1) – N(5)  | 0.1316     |
| Ni(1) – O(3) | 0.2377     | Ni(1) – O(3)  | 0.2295     |
| Ni(1) – O(4) | 0.2247     | Ni(1) – O(4)  | 0.2193     |
| N(1) – O(1)  | 1.3014     | N(1A) – O(1A) | 1.1641     |
| N(1) – O(2)  | 1.2126     | N(1A) – O(2A) | 1.3378     |
| N(2) – O(3)  | 1.5120     | N(2) – O(3)   | 1.5167     |
| N(2) – O(4)  | 1.4864     | N(2) – O(4)   | 1.4841     |



(a)

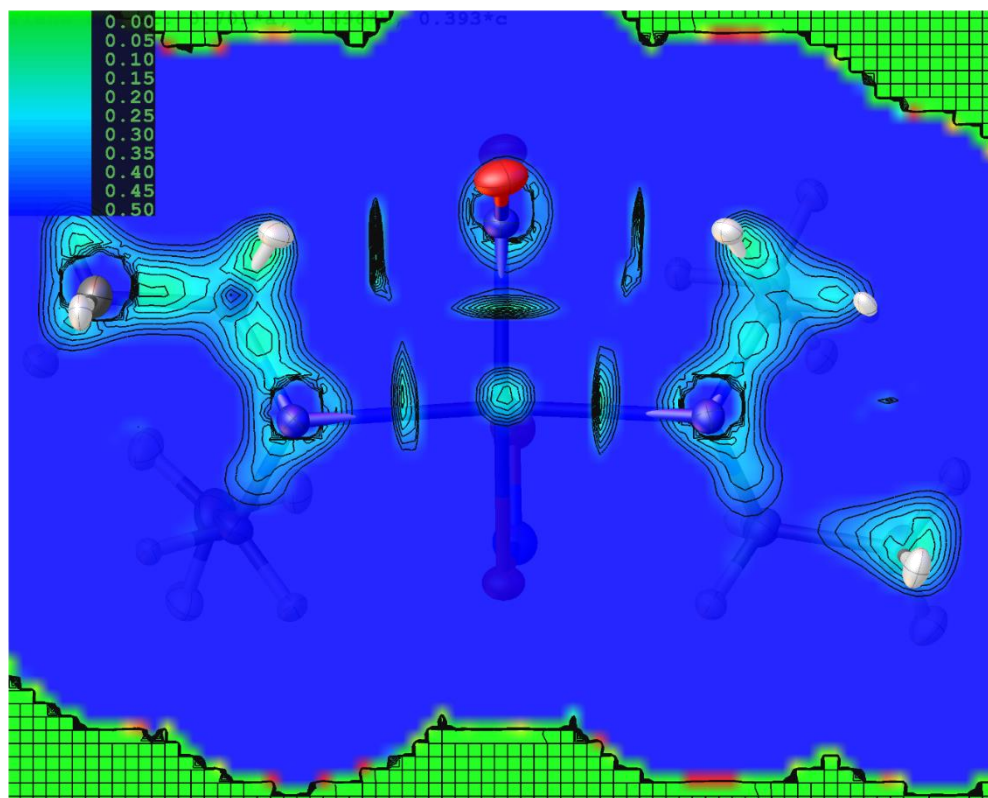

(b)

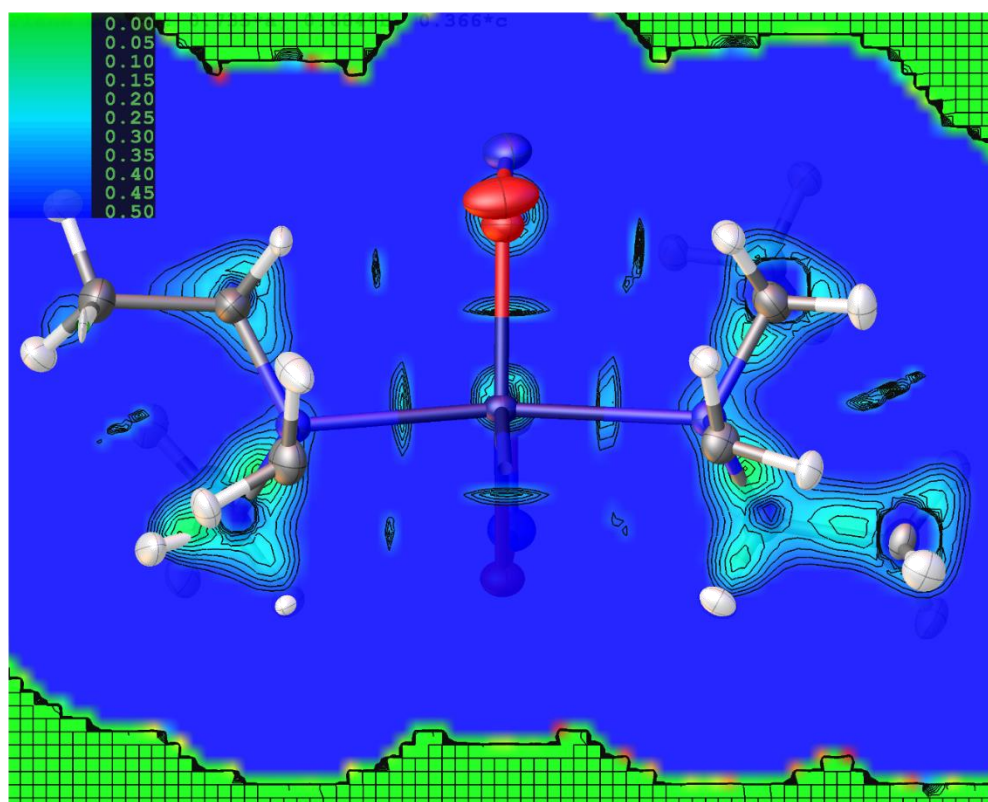

**Figure S2.3** Reduced density gradient (RDG,  $s$ ) 2D plots in the Ni(1), N(1), N(3), N(5) plane for the GS **(a)** and the Ni(1), O(1A), N(3), N(5) plane for the ES **(b)** of **2**, showing non-covalent interaction (NCI) features generated by HAR analysis in NoSpherA2.<sup>2</sup>

## Supplementary Movies for Complex 2

### SupplementaryMovie5.gif

Rotating 3D deformation density map for Complex 1 in the GS nitro-( $\eta^1$ -NO<sub>2</sub>) isomer.

<https://doi.org/10.6084/m9.figshare.21586788>

### SupplementaryMovie6.gif

Rotating 3D deformation density map for Complex 1 in the ES nitrito-( $\eta^1$ -QNO) isomer.

<https://doi.org/10.6084/m9.figshare.21586794>

### SupplementaryMovie7.gif

Rotating 3D Laplacian map for Complex 1 in the GS nitro-( $\eta^1$ -NO<sub>2</sub>) isomer.

<https://doi.org/10.6084/m9.figshare.21586797>

### SupplementaryMovie8.gif

Rotating 3D Laplacian map for Complex 1 in the ES nitrito-( $\eta^1$ -QNO) isomer.

<https://doi.org/10.6084/m9.figshare.21586800>

Supplementary movies can be accessed on FigShare via the links provided.

1. L. E. Hatcher, *CrystEngComm*, 2016, **18**, 4180-4187.
2. F. Kleemiss, O. V. Dolomanov, M. Bodensteiner, N. Peyerimhoff, L. Midgley, L. J. Bourhis, A. Genoni, L. A. Malaspina, D. Jayatilaka, J. L. Spencer, F. White, B. Grundkötter-Stock, S. Steinhauer, D. Lentz, H. Puschmann and S. Grabowsky, *Chemical Science*, 2021, **12**, 1675-1692.
3. G. W. T. M. J. Frisch, H. B. Schlegel, G. E. Scuseria, M. A. Robb, J. R. Cheeseman, G. Scalmani, V. Barone, B. Mennucci, G. A. Petersson, H. Nakatsuji, M. Caricato, X. Li, H. P. Hratchian, A. F. Izmaylov, J. Bloino, G. Zheng, J. L. Sonnenberg, M. Hada, M. Ehara, K. Toyota, R. Fukuda, J. Hasegawa, M. Ishida, T. Nakajima, Y. Honda, O. Kitao, H. Nakai, T. Vreven, J. A. Montgomery, Jr., J. E. Peralta, F. Ogliaro, M. Bearpark, J. J. Heyd, E. Brothers, K. N. Kudin, V. N. Staroverov, R. Kobayashi, J. Normand, K. Raghavachari, A. Rendell, J. C. Burant, S. S. Iyengar, J. Tomasi, M. Cossi, N. Rega, J. M. Millam, M. Klene, J. E. Knox, J. B. Cross, V. Bakken, C. Adamo, J. Jaramillo, R. Gomperts, R. E. Stratmann, O. Yazyev, A. J. Austin, R. Cammi, C. Pomelli, J. W. Ochterski, R. L. Martin, K. Morokuma, V. G. Zakrzewski, G. A. Voth, P. Salvador, J. J. Dannenberg, S. Dapprich, A. D. Daniels, Ö. Farkas, J. B. Foresman, J. V. Ortiz, J. Cioslowski, and D. J. Fox, *Journal*, 2009.
4. T. Lu and F. Chen, *Journal of Computational Chemistry*, 2012, **33**, 580-592.
5. L. E. Hatcher, J. Christensen, M. L. Hamilton, J. Trincão, D. R. Allan, M. R. Warren, I. P. Clarke, M. Towrie, D. S. Fuertes, C. C. Wilson, C. H. Woodall and P. R. Raithby, *Chemistry – A European Journal*, 2014, **20**, 3128-3134.
